# Supplementary material for: Combination of Low Concentration of (−)-Epigallocatechin Gallate (EGCG) and Curcumin Strongly Suppresses the Growth of Non-Small Cell Lung Cancer in Vitro and in Vivo through Causing Cell Cycle Arrest
Source: Int J Mol Sci. 2013 Jun 5;14(6):12023–36. doi: 10.3390/ijms140612023 (PMC3709771; doi:10.3390/ijms140612023)
Supplement: Supplementary file 1 [file ijms-14-12023-s001.pdf]

## Supplementary Information

**Table S1.** The inhibition rate of EGCG and curcumin in A549 cells.

| EGCG ( $\mu\text{mol/L}$ ) | Inhibition rate   | Curcumin ( $\mu\text{mol/L}$ ) | Inhibition rate   |
|----------------------------|-------------------|--------------------------------|-------------------|
| 10                         | $0.012 \pm 0.008$ | 10                             | $0.162 \pm 0.031$ |
| 20                         | $0.071 \pm 0.022$ | 20                             | $0.221 \pm 0.029$ |
| 30                         | $0.165 \pm 0.028$ | 30                             | $0.388 \pm 0.035$ |
| 40                         | $0.363 \pm 0.031$ | 40                             | $0.524 \pm 0.027$ |

**Table S2.** The inhibition rate and CI value of EGCG combined with curcumin in A549 cells.

| EGCG ( $\mu\text{mol/L}$ ) | Curcumin ( $\mu\text{mol/L}$ ) | Inhibition rate of combination | Combination index (CI) |
|----------------------------|--------------------------------|--------------------------------|------------------------|
| 10                         | 10                             | $0.382 \pm 0.038$              | 0.57713                |
| 10                         | 20                             | $0.483 \pm 0.045$              | 0.69498                |
| 20                         | 10                             | $0.526 \pm 0.048$              | 0.58945                |
| 20                         | 20                             | $0.640 \pm 0.043$              | 0.60990                |

**Table S3.** The inhibition rate of EGCG and curcumin in H460 cells.

| EGCG ( $\mu\text{mol/L}$ ) | Inhibition rate   | Curcumin ( $\mu\text{mol/L}$ ) | Inhibition rate   |
|----------------------------|-------------------|--------------------------------|-------------------|
| 40                         | $0.072 \pm 0.023$ | 10                             | $0.091 \pm 0.019$ |
| 60                         | $0.214 \pm 0.034$ | 20                             | $0.263 \pm 0.036$ |
| 80                         | $0.626 \pm 0.038$ | 40                             | $0.517 \pm 0.025$ |

**Table S4.** The inhibition rate and CI value of EGCG combined with curcumin in H460 cells.

| EGCG ( $\mu\text{mol/L}$ ) | Curcumin ( $\mu\text{mol/L}$ ) | Inhibition rate of combination | Combination index (CI) |
|----------------------------|--------------------------------|--------------------------------|------------------------|
| 40                         | 10                             | $0.621 \pm 0.042$              | 0.67703                |
| 40                         | 20                             | $0.703 \pm 0.048$              | 0.75959                |
| 60                         | 10                             | $0.752 \pm 0.039$              | 0.76162                |
| 60                         | 20                             | $0.881 \pm 0.052$              | 0.67159                |

**Table S5.** The distribution of cell cycle after the indicated treatment.

|           | Control | EGCG (10 $\mu\text{mol/L}$ ) | Curcumin (10 $\mu\text{mol/L}$ ) | Combination |
|-----------|---------|------------------------------|----------------------------------|-------------|
| G1 Phase  | 75.02%  | 75.60%                       | 72.87%                           | 48.79%      |
| S Phase   | 19.09%  | 22.12%                       | 22.08%                           | 35.39%      |
| G2 Phase  | 5.89%   | 2.28%                        | 5.04%                            | 15.82%      |
| Apoptosis | 0.89%   | 0.13%                        | 0.08%                            | 2.61%       |
| (Mean)    | (23.72) | (23.28)                      | (22.08)                          | (22.51)     |
